# Supplementary material
Source: PubMed Central journal article supplement (PMC3651493)
Supplement: 1221341110_pnas.201221341SI.pdf [file 1221341110_pnas.201221341SI.pdf]

# Supporting Information

Takaku et al. 10.1073/pnas.1221341110

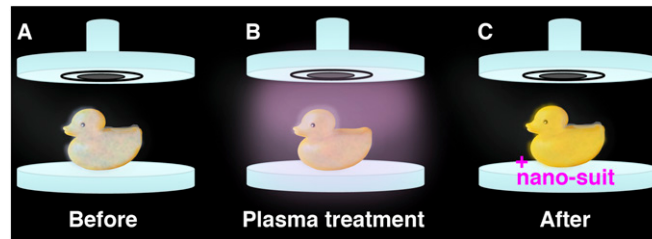

**Fig. S1.** (A–C) Schematic drawing of surface modification by plasma. A specimen is set into a standard ion-sputtering device whose metal emitter has been removed (A). Materials covering on the entire specimen are irradiated with plasma inside this device for 3 min (B). A flexible nano-suit is formed (C).

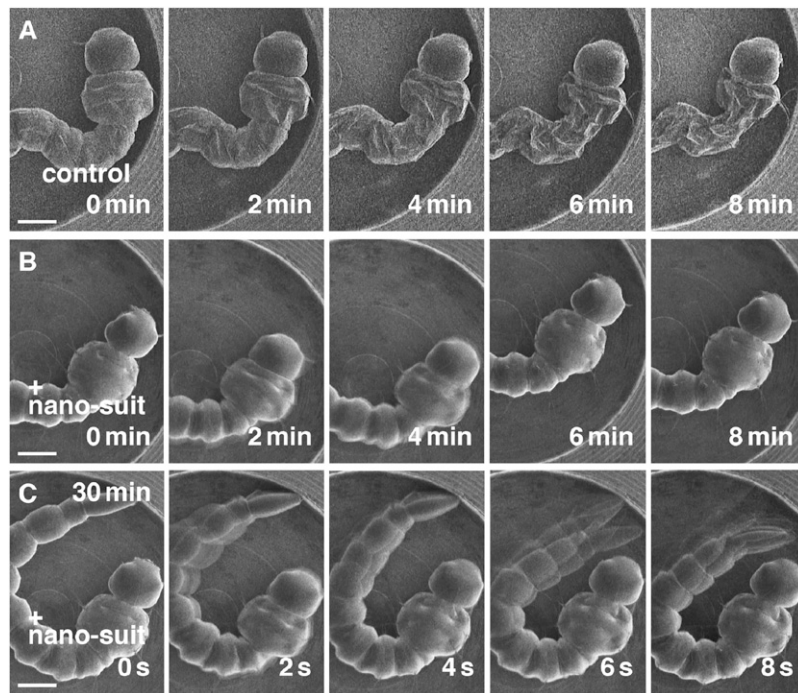

**Fig. S2.** (A and B) Comparison of treatments with distilled water and Tween 20 solution of a larva of the mosquito *Aedes albopictus*. The larva cultured in distilled water shows rapid shrinkage during SEM observation (A). The larva of *A. albopictus* treated with 1% Tween 20 retains its morphology when observed by SEM (B). Sequential images show movements of the living mosquito larva exposed to high vacuum with electron-beam irradiation for 30 min (C). Blurred images (B and C) indicate active movements. (Scale bars: 0.5 mm.)

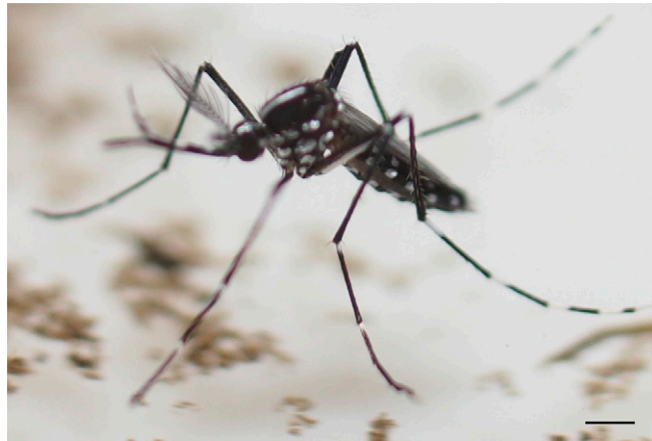

Fig. S3. The adult mosquito developed from the larval *Aedes albopictus* that 3 d earlier had been observed under SEM. (Scale bar: 1 mm.)

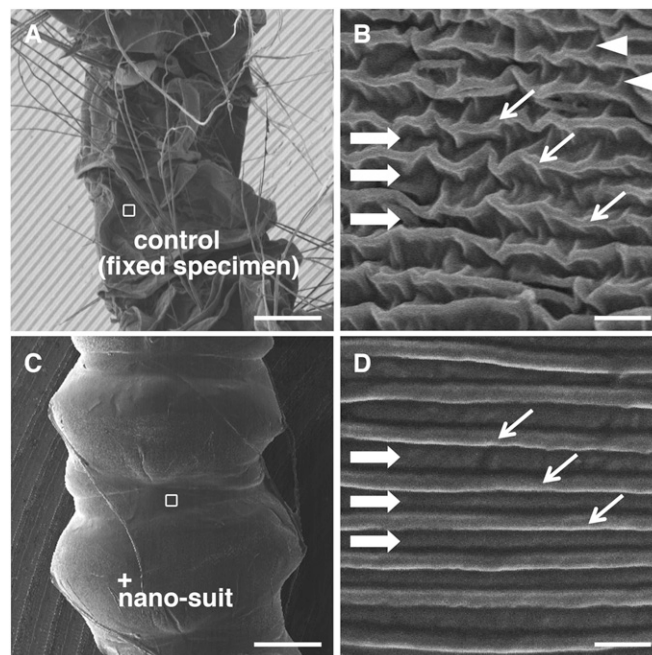

Fig. S4. (A–D) Comparison of two types of sample preparation when viewed with SEM. (A and B) High-magnification images of a mosquito larva, *Aedes albopictus*, prepared for conventional SEM observation. (C and D) Images of a larva protected by electron-beam-irradiated Tween 20 as described in this paper. The small white squares in A and C are shown magnified (B and D, respectively), with high resolution. [Scale bars: 0.3 mm (A and C) and 1  $\mu$ m (B and D).]

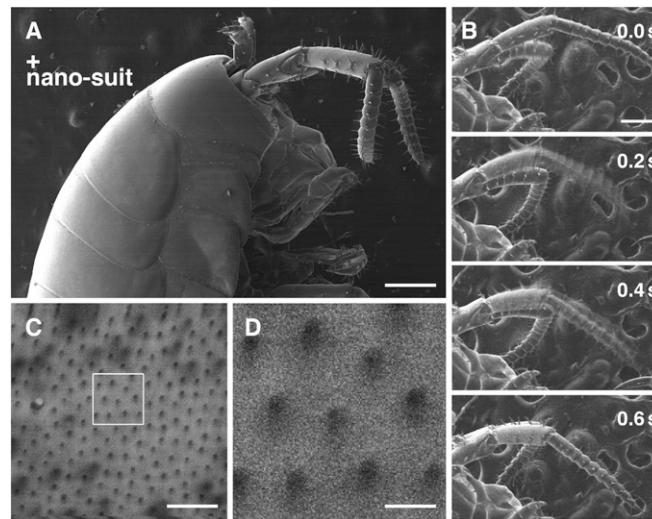

**Fig. S5.** (A) The head and thoracic part of a living amphipod *Talitrus saltator* treated with 1% Tween 20 retains its morphology when observed by SEM. (B) Active movement of an antenna observed for 0.6 s. (C) Dorsal ridge of the basipod of the sixth pereopod. A small white square in C is shown magnified (D) with high resolution. [Scale bars: 200  $\mu\text{m}$  (A), 100  $\mu\text{m}$  (B), 1  $\mu\text{m}$  (C), and 200 nm (D).]

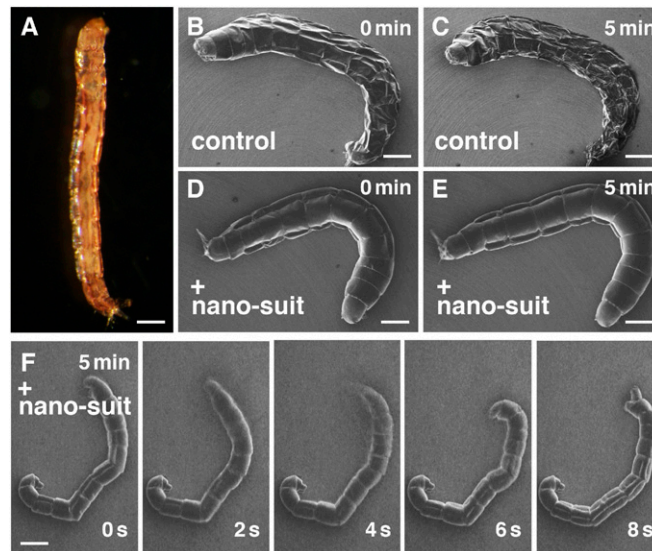

**Fig. S6.** (A) Light microscopic observation of a larval midge (*Chironomus yoshimatsui*), which has no natural extracellular substance layer. Comparison of treatments with distilled water and Tween 20 solution of the larva. (B and C) A living larva was exposed to high vacuum with electron-beam radiation in the SEM, showing rapid dehydration-related collapse within 5 min. (D and E) The larva pretreated with 1% Tween 20 retains its morphology within 5 min. (F) Sequential SEM images showing movements of a living larva treated with 1% Tween 20 and plasma irradiation for 3 min, and then observed by SEM for 5 min. Blurring images indicate active movements. (Scale bar: 0.3 mm.)

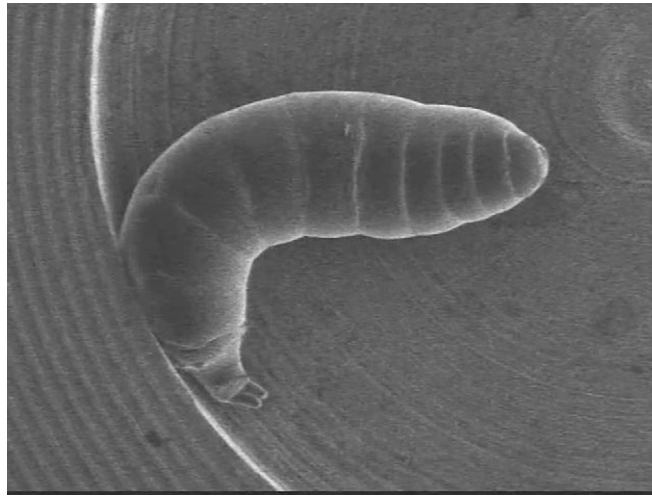

**Movie S1.** Movements of a living larva of *Drosophila* observed by SEM. The untreated animal was irradiated with an electron beam (5.0 kV) and exposed to high vacuum ( $10^{-5}$  to  $10^{-7}$  Pa) for 60 min (compare Fig. 1 C and D).

[Movie S1](#)

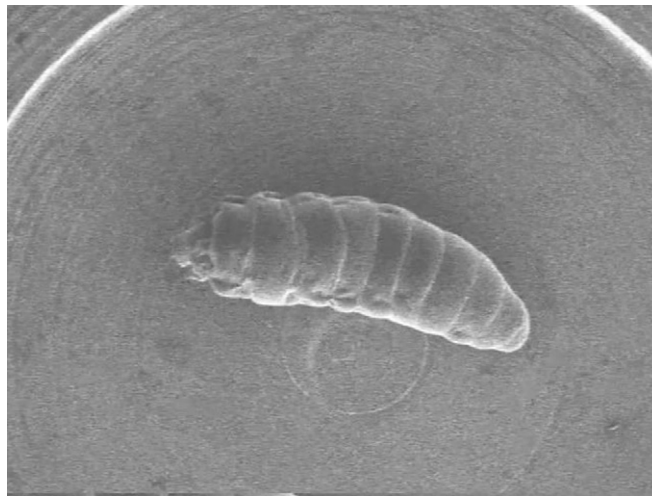

**Movie S2.** Movements of a living larva of *Drosophila* pretreated by plasma irradiation for 3 min and observed by SEM for 60 min (compare Fig. 2 C and D).

[Movie S2](#)

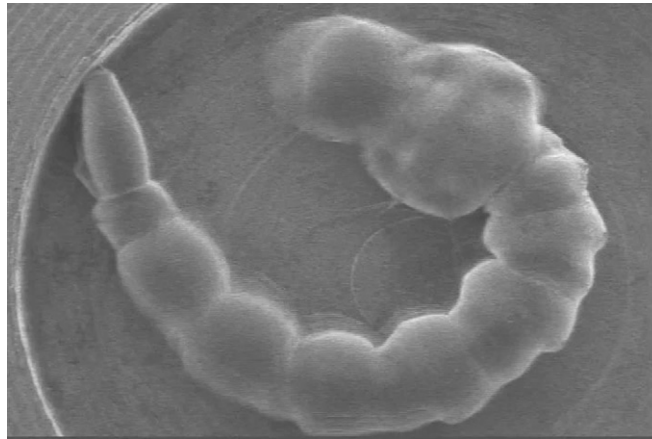

**Movie S3.** Movements of a living larva of the mosquito *Aedes albopictus* covered with 1% Tween 20 and observed by SEM. Although exposed to high vacuum, the animal showed active movements for 30 min (compare Figs. S2C and S4 C and D).

[Movie S3](#)

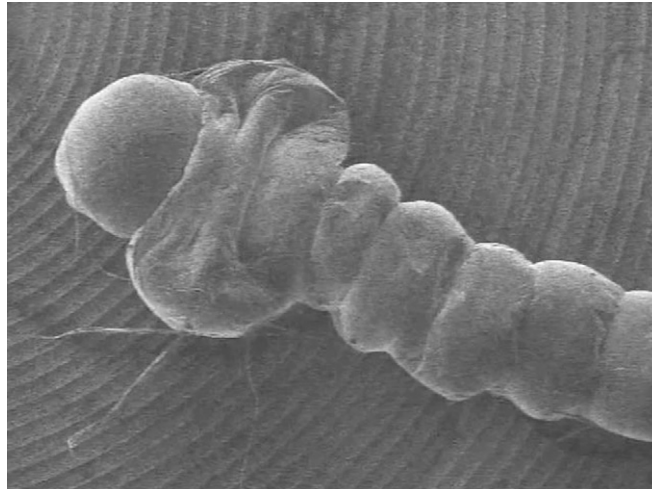

**Movie S4.** Movements of a living larva of the mosquito *Culex pipiens molestus* observed by SEM following pretreatment with the plasma polymerization method. In brief, the surface of the animal was covered with 1% Tween 20 and irradiated in rarified air-derived plasma (*Materials and Methods*) for 3 min. Although exposed to high vacuum, the animal showed active movements for 30 min (compare Fig. 2 *M* and *N*). The ordered fine structures shown in Fig. 2*N* were observed at the end of this movie.

[Movie S4](#)
